# Supplementary material for: Multiplexed surface micropatterning of proteins with a pressure-modulated microfluidic button-membrane
Source: Royal Society of Chemistry journal article supplement (doi:10.1039/c2cc37740c), 2012-11-16
Supplement: c2cc37740c.pdf [file c2cc37740c.pdf]

## Supplementary Information

---

### ***Multiplexed surface micropatterning of proteins with a pressure-modulated button membrane***

Jose L. Garcia-Cordero<sup>1</sup> and Sebastian J. Maerkl<sup>1</sup>

<sup>1</sup>Institute of Bioengineering, School of Engineering and School of Life Sciences, École Polytechnique Fédérale de Lausanne (EPFL), Lausanne, Switzerland.

Correspondence should be addressed to S.J.M. ([sebastian.maerkl@epfl.ch](mailto:sebastian.maerkl@epfl.ch))

### **Experimental details**

**Microfluidic chip fabrication and operation.** The microfluidic device consisted of a flow and control layers. Molds for each layer were fabricated using standard lithography techniques on 4" silicon wafers. The control and flow layer molds were patterned with SU8 photoresist to a height of ~30  $\mu\text{m}$ , and with AZ9260 photoresist to a height of ~10  $\mu\text{m}$ , respectively. The flow mold was baked at 190°C for one hour in a convection oven to obtain a round channel profile. Devices were cast in polydimethylsiloxane (Sylgard 184, Dow Corning) using the techniques of multilayer soft lithography. Briefly, PDMS was prepared at a 20:1 ratio and spin-coated on the flow layer mold at 1900 rpm. PDMS at a 5:1 ratio was cast on the control layer mold to a thickness of 5 mm. Both layers were baked at 80°C for 30 min. The control layer was peeled off from its mold and manually aligned to the flow layer mold, followed by a baking step at 80°C for 90 min. Pressure for flow channels was set to 10 kPa using an analog pressure gauge.

**Preparation of epoxy-silane glass slides.** 720 mL of milli-Q water and ammonia solution ( $\text{NH}_4\text{OH}$  25%) in a 5:1 ratio, respectively, was heated to 80°C. Next, 150 mL of hydrogen peroxide ( $\text{H}_2\text{O}_2$  30%) was added to the mix. Glass microscope slides were bathed in the solution for 30 min. The slides were then rinsed with milli-Q water and dried under a stream on nitrogen. Next, the slides were incubated in a solution of 1% 3-Glycidoxypropyl-trimethoxymethylsilane (97% pure) in toluene for 20 min, after which they were rinsed with toluene and dried. Next, the glass slides were placed in a convection oven for 30 min at 120°C, followed by a sonication step in toluene for 20 min, rinsed with isopropanol, and dried. Glass slides were stored in vacuum at room temperature.

**Biotin-neutravidin assay.** All reagents were aspirated into Tygon tubing (0.020" ID, AAQ02103, Coler-Parmer). Microfluidic control channels were primed with  $\text{dH}_2\text{O}$ . The button membrane was initially actuated at 170 kPa. 1% bovine serum albumin (BSA) and 1% casein in PBS were flowed through the channels for 20 min to block the surface. Channels were cleaned with washing buffer (PBS/Tween 0.005%) for 5 min. Pressure on the button was released and biotin-BSA (29130, Thermo Fisher Scientific) at a concentration of 2 mg/mL

## Supplementary Information

flowed for 20 min and washed for 5 min. The button membrane was actuated at 62 kPa and the first DyLight 650 conjugated neutravidin (84607, Thermo Scientific) at a concentration of 20 µg/ml flowed through the chip for 20 min, followed by a 10-min washing step. Next, the button was actuated at 27 kPa, and the second DyLight 550 conjugated neutravidin (84606, Thermo Scientific) at a concentration of 10 µg/ml flowed through the chip for 20 min, followed by a 10-min washing step. Finally, the pressure on the button was released and the third DyLight 488 conjugated neutravidin (22832, Thermo Scientific) at a concentration of 10 µg/ml flowed through the chip for 20 min, followed by a 10-min washing step. The chip was scanned using a fluorescent microarray scanner (ArrayWorx e-Biochip Reader, Applied Precision, USA) equipped with a Cy3 filter (540/25 X, 595/50 M), a Cy5 filter (635/30 X, 685/40 M), and an Alexa 488 filter (480/30 X, 530/40 M). Devices were scanned with an exposure time of 1 sec at the highest resolution of 3.25 µm. Stitched images were exported as a 16-bit TIFF file, **Fig. 3a**. The same chip was imaged with an inverted epi-fluorescence microscope (Eclipse Ti-E, Nikon Instruments) using a 20x achromat LWD objective (MRP00202, Nikon Instruments). The microscope was equipped with an LED based system for fluorescence illumination with three different filter cubes (Ex 460 500/DM505/BA 510-560, CY3-NX/MXU9621/C105216, CY5-MXU96214/C104453, Nikon Instruments). Images were acquired using a back-illuminated cooled CCD camera (Ixon DU-888, Andor Technology), **Fig. 3b**.

**Sandwich immunoassay.** Standard proteins and antibodies were purchased from eBioscience (San Diego, USA), and are summarized in the table below. Biotinylated antibodies and fluorescently-labeled antibodies were diluted in 1% casein in PBS (37528, Thermo Scientific) to a concentration of 2 µg/mL and 5 ng/mL, respectively.

|                               | Mouse<br>recombinant protein | Capture antibody<br>Biotin | Detection antibody<br>Fluorescent |
|-------------------------------|------------------------------|----------------------------|-----------------------------------|
| <b>IL6</b>                    | 39-8061-60                   | 36-7062-85                 | 12-7061-41 (PE)                   |
| <b>TNF<math>\alpha</math></b> | 39-8321-60                   | 13-7341-81                 | 19-7321-81 (Cy5)                  |
| <b>IL12 p70</b>               | 39-8121-60                   | 14-7122-85                 | 12-7123-41 (PE)                   |

Biotin-BSA was flowed through the chip for 20 min and washed for 5 min. 15 µL of neutravidin (31000, Thermo Fisher Scientific) at a concentration of 0.5 mg/mL was then flowed for 20 min and washed for 5 min. The button was actuated at 170 kPa and biotin-BSA flowed again for 20 more min, followed by a washing step for 10 min. Biotinylated anti-IL6 was flowed for 20 min, washed for 10 min. Next, the pressure was decreased to 62 kPa and biotinylated anti-TNF $\alpha$  flowed for 20 min and washed for 10 min. Then, the pressure on the button was released and biotinylated anti-IL12p70 flowed for 20 more min and washed for 10 min. A solution containing the three cytokines, each at a concentration of 100 pM, was introduced in the chip for 20 min, followed by a washing step. Finally, a solution of the three

## Supplementary Information

---

detection antibodies was loaded in the chip for 20 min and washed for an additional 10 min. The chip was then scanned using the same fluorescent microarray scanner.
